# Supplementary material
Source: PubMed Central journal article supplement (PMC9630986)
Supplement: iyac136_supplementary_figure_s2.pdf [file iyac136_supplementary_figure_s2.pdf]

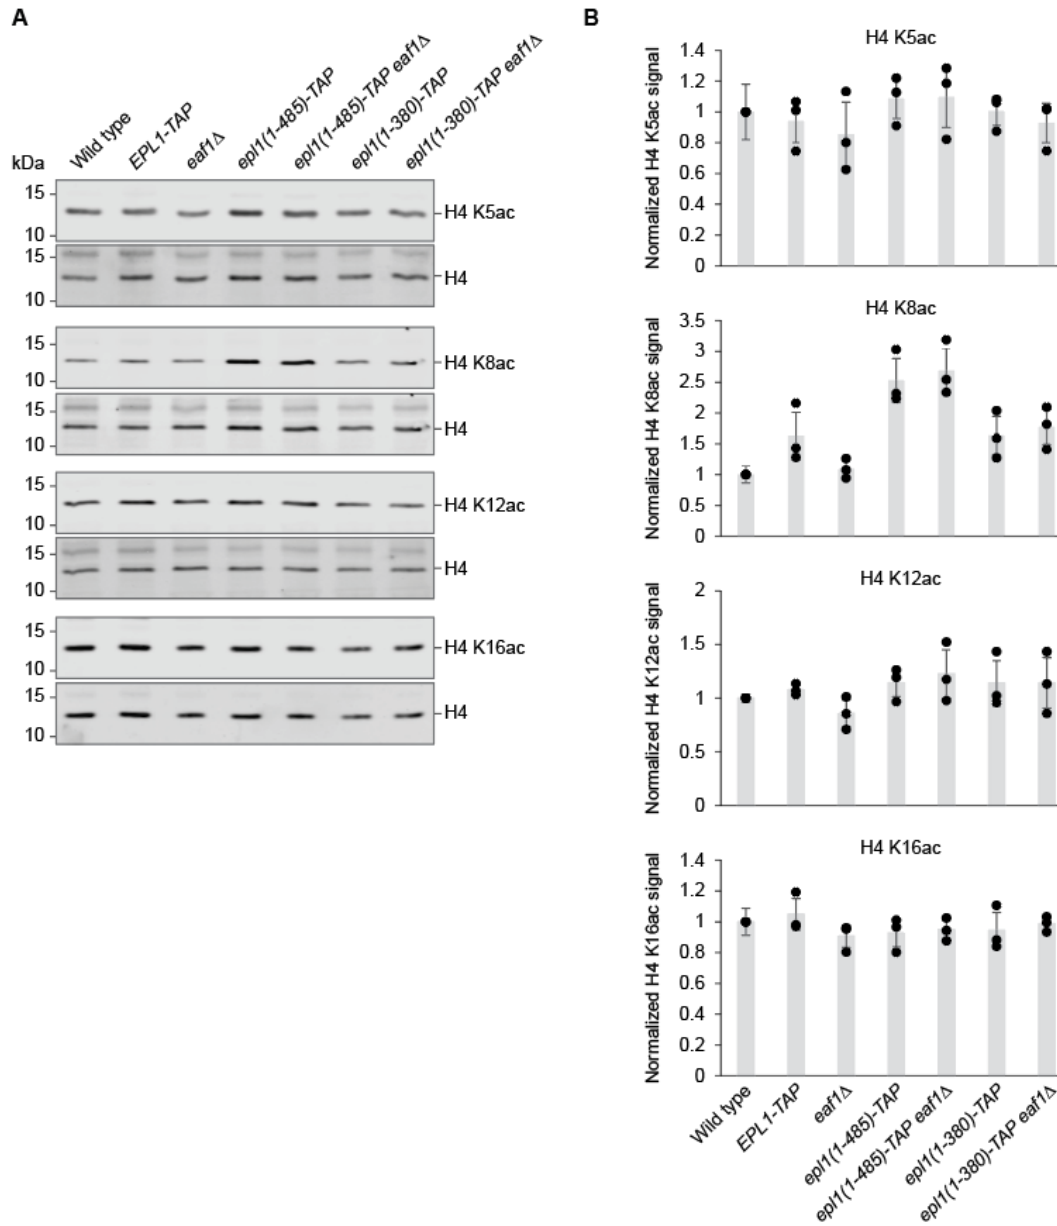

**Figure S2.** H4 Lysine-specific bulk acetylation levels revealed modest decreases in H4K5ac and K12ac in the *eaf1Δ* mutant. (A) Bulk histone acetylation was examined from whole cell extracts by protein blotting using the indicated antibodies with H4 serving as a loading control. (B) The acetylation signals were quantified relative to H4 and normalized to the wild type strain. Averages were taken across three replicates, with error bars indicating the standard deviation.
