# Supplementary material
Source: PubMed Central journal article supplement (PMC9630986)
Supplement: iyac136_supplementary_figure_s3.pdf [file iyac136_supplementary_figure_s3.pdf]

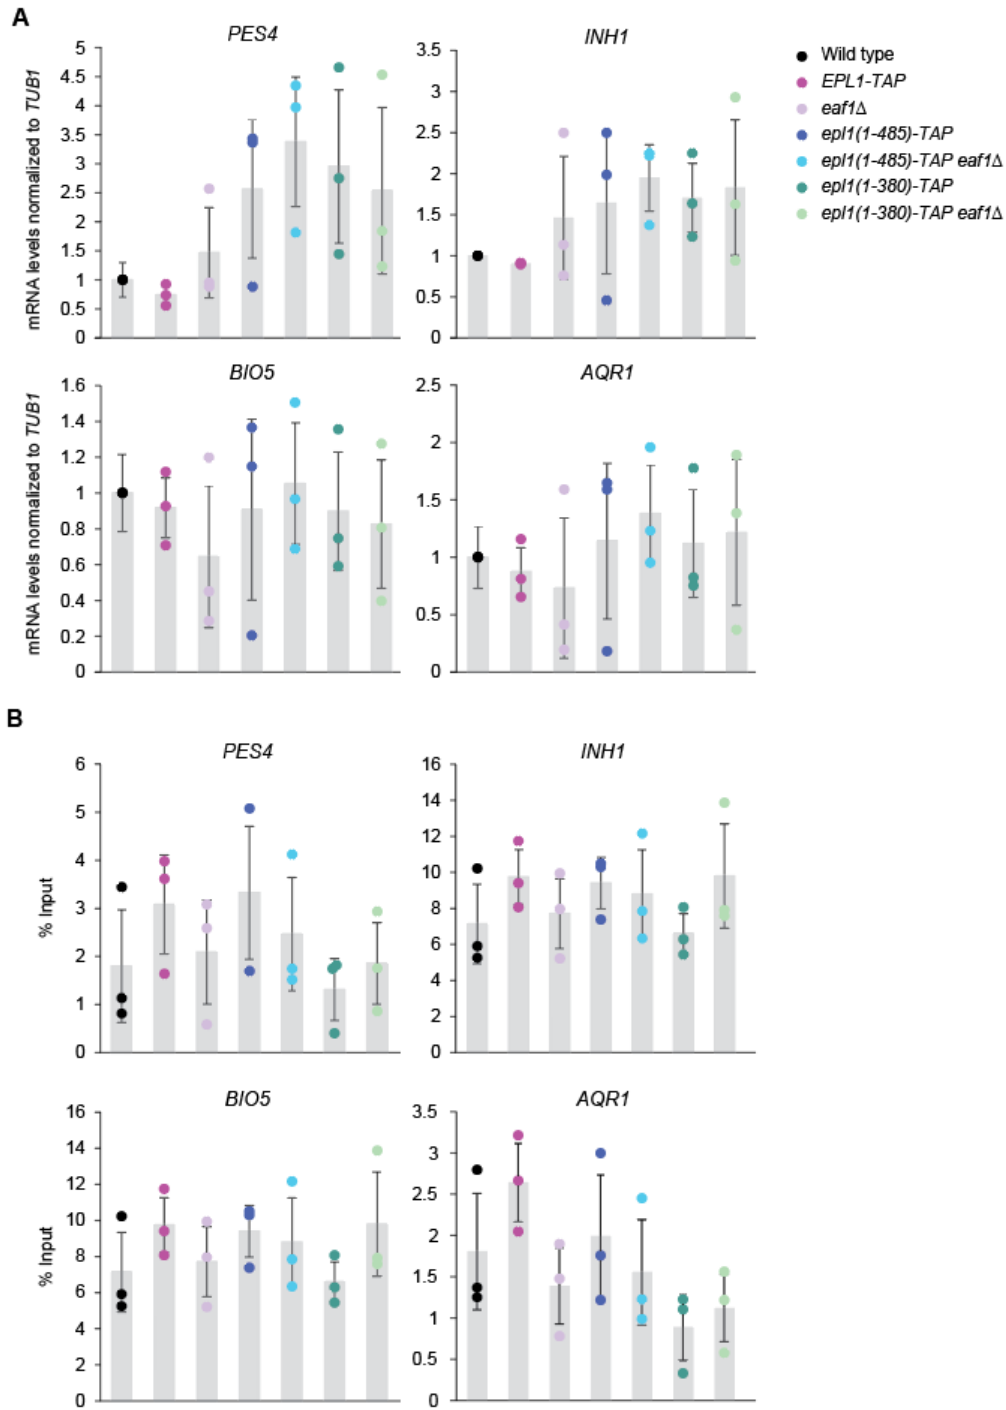

**Figure S3.** (A) H4 promoter acetylation at non-RP genes was not affected by loss of *EAF1* or truncation of *EPL1*. Enrichment of H4 tetra-acetylation was normalized to percent input. (B) mRNA levels were measured by RT-qPCR and normalized to *TUB1* mRNA levels. Error bars represent standard deviation of the means for three independent experiments.
