# Supplementary material
Source: PubMed Central journal article supplement (PMC9630986)
Supplement: iyac136_supplementary_figure_s4.pdf [file iyac136_supplementary_figure_s4.pdf]

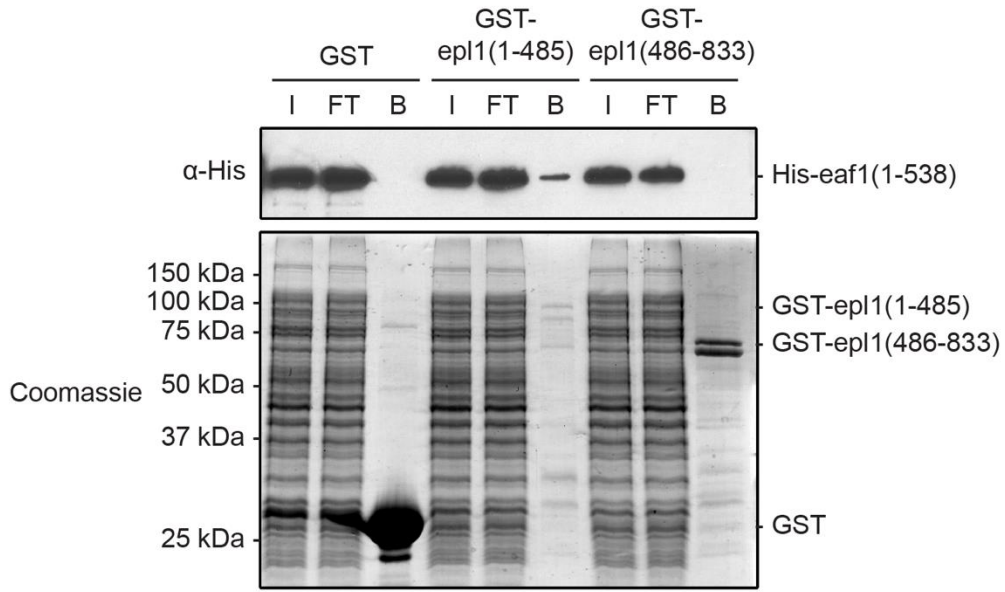

**Figure S4.** Eaf1 interacted with Epl1(1-485). Lysates of *E. coli* co-expressing His-Eaf1(1-538) with either GST, GST-Epl1(1-485), or GST-Epl1(486-833) were purified using glutathione resin. I, FT, and B denote Input, Flow-through, and Bead fractions, respectively.
