# Supplementary material
Source: PubMed Central journal article supplement (PMC9630986)
Supplement: iyac136_supplementary_figure_s5.pdf [file iyac136_supplementary_figure_s5.pdf]

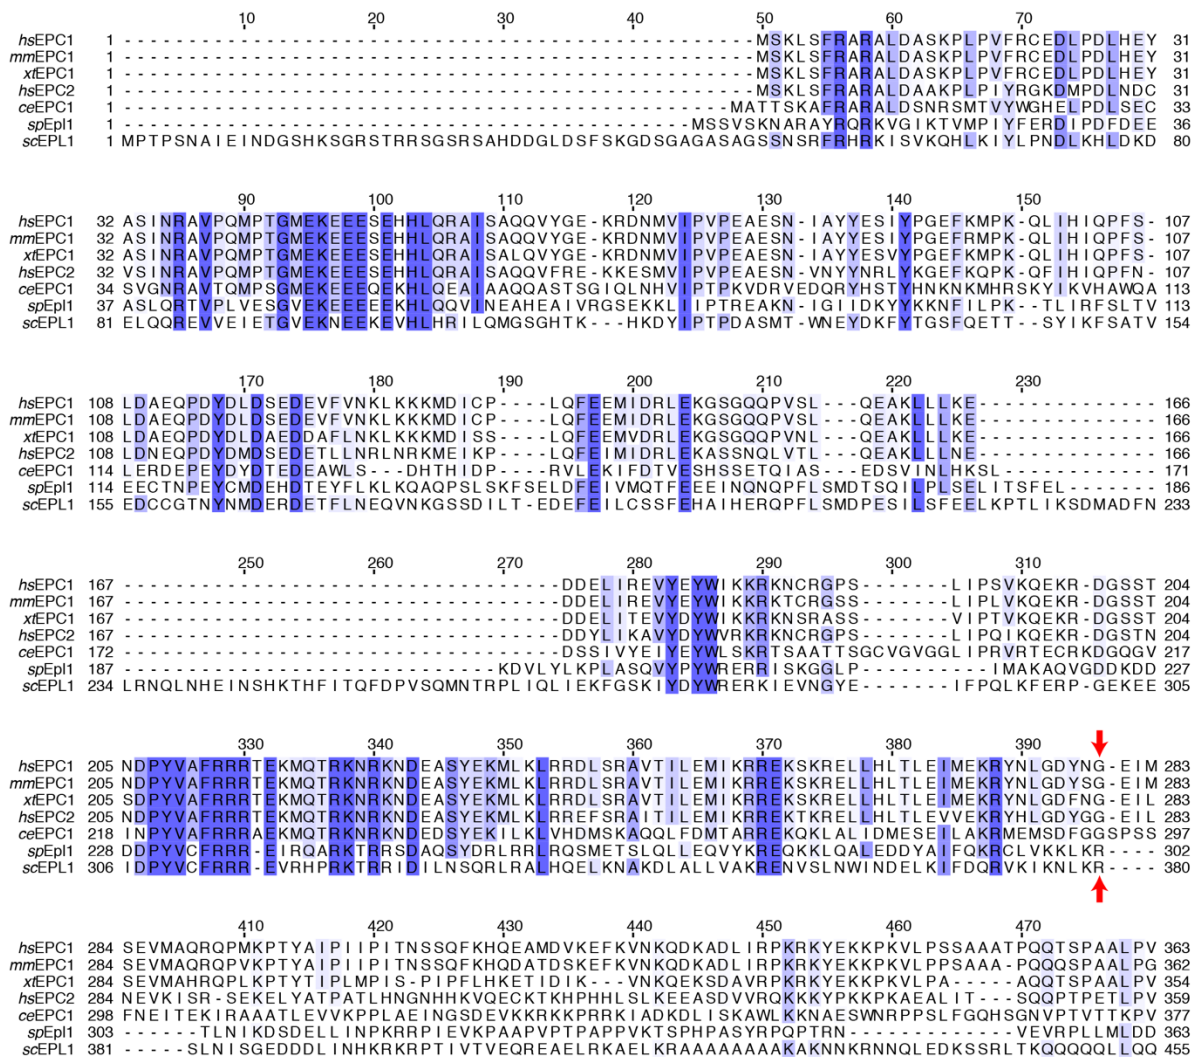

**Figure S5.** EPC1(2-280) corresponds to Epl1(1-380). The protein sequence alignment of the N-terminal portions of Epl1 homologs from *Homo sapiens*, *Mus musculus*, *Xenopus tropicalis*, *Caenorhabditis elegans*, *Schizosaccharomyces pombe*, and *Saccharomyces cerevisiae* was generated using ClustalX (Larkin *et al.* 2007) and visualized using Jalview (Waterhouse *et al.* 2009), with blue shading indicating the degree of sequence conservation. The location of *S. cerevisiae* Epl1 residue 380 and *H. sapiens* EPC1 residue 280 is indicated by red arrows.
