# Supplementary material
Source: PubMed Central journal article supplement (PMC9630986)
Supplement: iyac136_supplementary_figure_s6.pdf [file iyac136_supplementary_figure_s6.pdf]

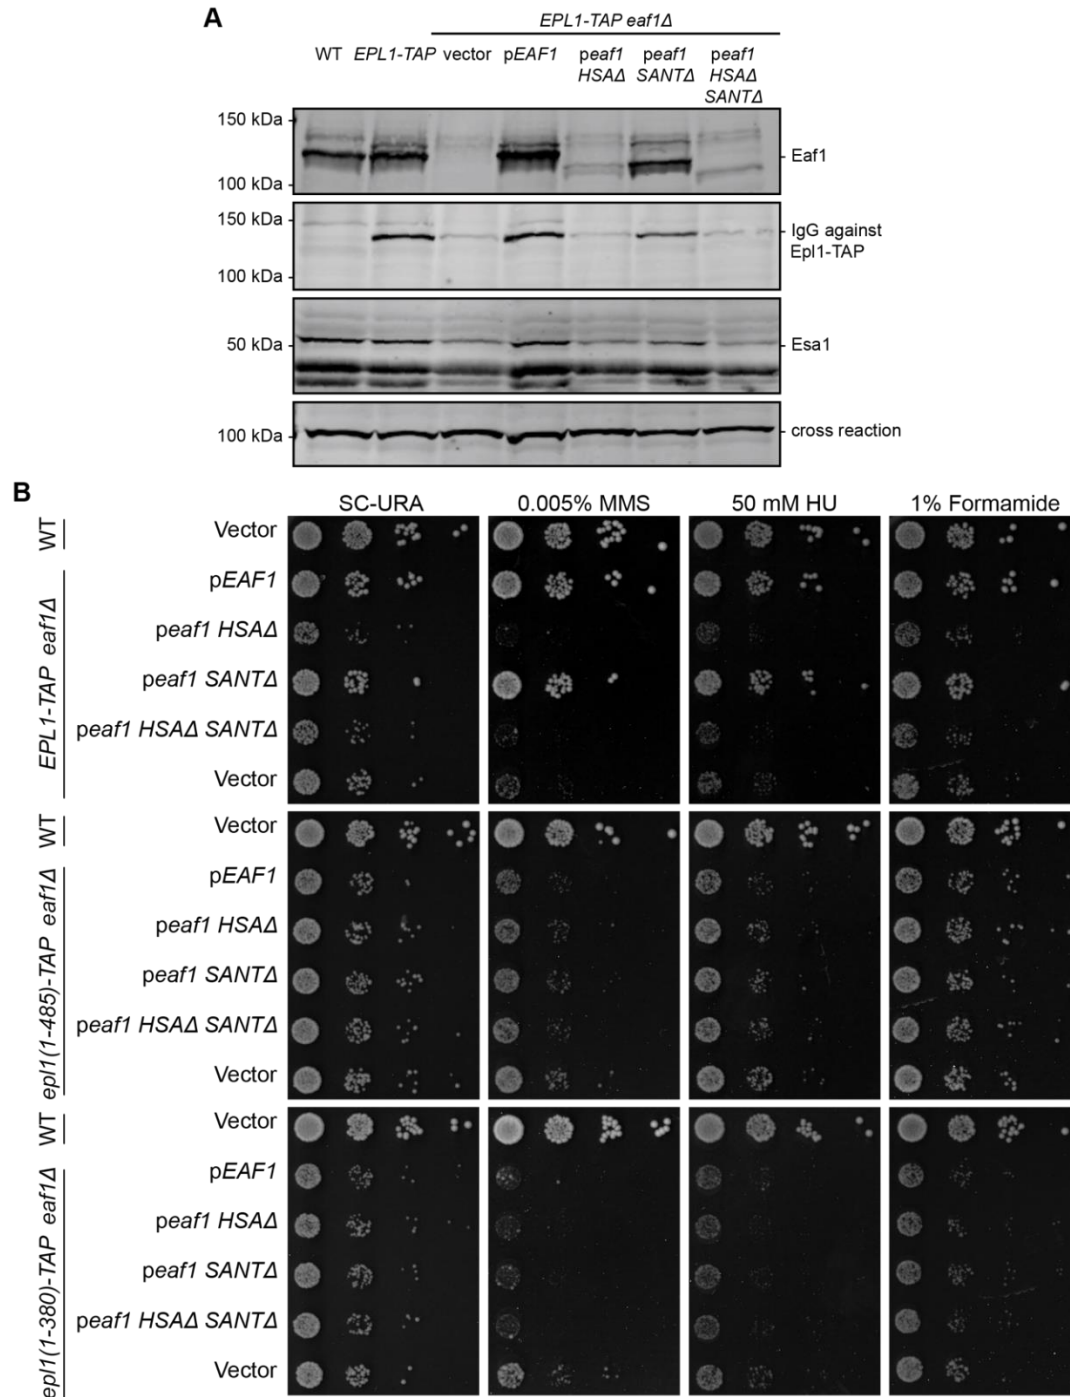

**Figure S6.** The *eaf1* HSAΔ mutant phenocopied the complete loss of *EAF1* (A) The loss of the Eaf1 HSA domain was associated with decreased amounts of Epl1 and Esa1/Kat5 in the cell. Whole cell extracts were analyzed for total Epl1, Eaf1 and Esa1/Kat5 levels by protein blotting. A cross-reactive band was used as a loading control. (B) *ep1(1-485)* or *ep1(1-380)* masked the growth phenotypes of *eaf1* internal truncation mutants. Ten-fold serial dilutions of the indicated strains were plated onto SC-URA media containing the indicated genotoxic agents and incubated for 3 days at 30°C.
